# Supplementary material for: User Perspectives of a Web-Based Data-Sharing Platform (Open Humans) on Ethical Oversight in Participant-Led Research: Protocol for a Quantitative Study
Source: PubMed Central journal article supplement (PMC6291678; doi:10.2196/10939), 2018-11-28

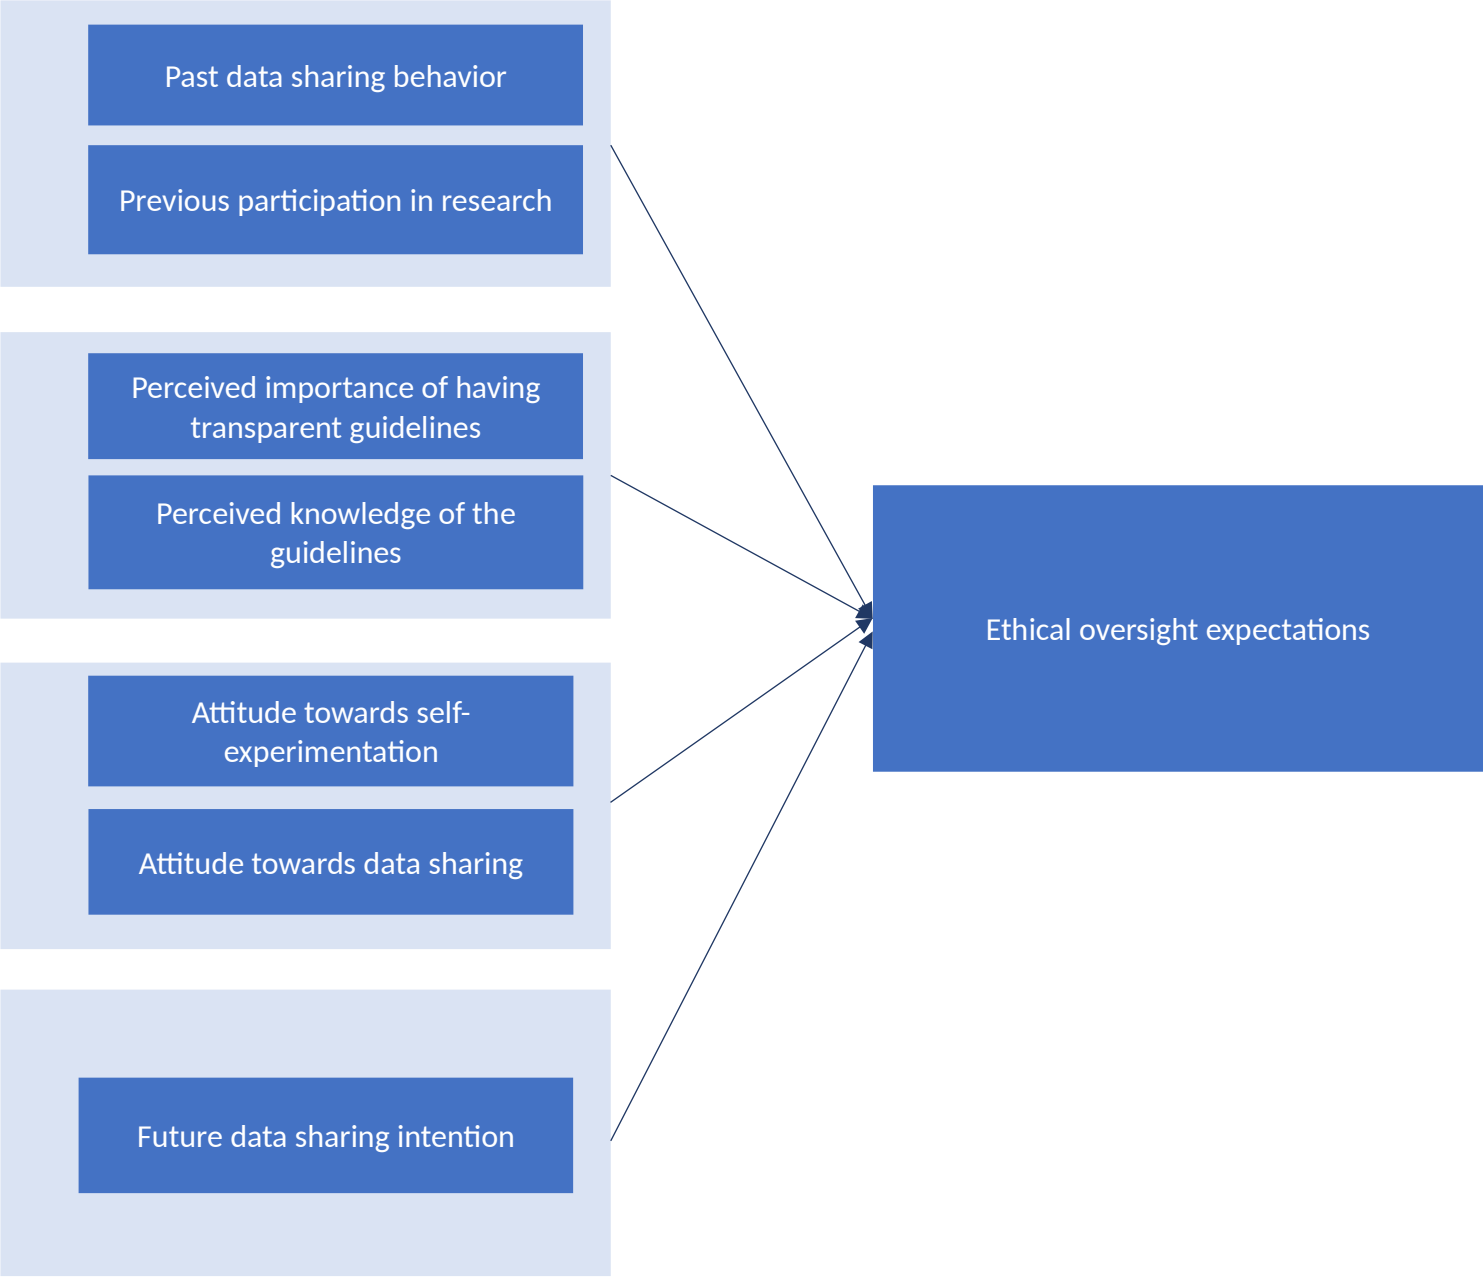

Supplement: resprot_v7i11e10939_app1.pdf [file resprot_v7i11e10939_app1.pdf]
