# Supplementary material for: User Perspectives of a Web-Based Data-Sharing Platform (Open Humans) on Ethical Oversight in Participant-Led Research: Protocol for a Quantitative Study
Source: PubMed Central journal article supplement (PMC6291678; doi:10.2196/10939), 2018-11-28
Supplement: resprot_v7i11e10939_app2.pdf [file resprot_v7i11e10939_app2.pdf]

# Open Humans Survey

---

Dear participant,

Thank you for taking the time to take part in this survey.

You should have arrived on this page because you joined our project on Open Humans and clicked on "I AGREE" on the consent form. *(If you take this survey without joining the project on Open Humans, your answers will not be counted, even if you click "yes" below.)*

Please note that we have no access to your personal Open Human data and individual answers to the survey will be kept confidential. Therefore, we kindly ask you to answer all questions truthfully. When we ask for your opinions and beliefs, there are no right or wrong answers.

Completion of the survey should take maximum 15 minutes. At the end, we will ask you whether you want to receive your own answers and/or all answers from this project as an aggregate once the study is over. This way, you can compare your own answers with those of the other participants.

The Open Humans project page ['Data sharing and ethical oversight' can be found here](#).

## Governance of Open Humans

Please tell us your *opinion*

**Q1** How familiar are you with how decisions about the Open Humans website (platform) are being made?

Not familiar at all  
Moderately familiar  
Very familiar

**Q2** How familiar are you with the following guidelines and terms of Open Humans?

|                         | Not familiar at all | Moderately familiar | Very familiar |
|-------------------------|---------------------|---------------------|---------------|
| Privacy guidelines      |                     |                     |               |
| Project guidelines      |                     |                     |               |
| Public data guidelines  |                     |                     |               |
| Private data guidelines |                     |                     |               |
| Community guidelines    |                     |                     |               |
| Sharing guidelines      |                     |                     |               |
| Naming guidelines       |                     |                     |               |
| Research guidelines     |                     |                     |               |
| Terms of use            |                     |                     |               |

**Q3** How important do you find it that Open Humans has transparent guidelines in the following areas?

|              | Not important at all | Slightly important | Moderately important | Very important | Extremely important |
|--------------|----------------------|--------------------|----------------------|----------------|---------------------|
| Privacy      |                      |                    |                      |                |                     |
| Projects     |                      |                    |                      |                |                     |
| Public data  |                      |                    |                      |                |                     |
| Private data |                      |                    |                      |                |                     |
| Community    |                      |                    |                      |                |                     |
| Sharing      |                      |                    |                      |                |                     |
| Naming       |                      |                    |                      |                |                     |
| Research     |                      |                    |                      |                |                     |
| Terms of use |                      |                    |                      |                |                     |

**Q4** How important do you find it that online platforms in general have transparent guidelines in the following areas?

|              | Not important<br>at all | Slightly<br>important | Moderately<br>important | Very<br>important | Extremely<br>important |
|--------------|-------------------------|-----------------------|-------------------------|-------------------|------------------------|
| Privacy      |                         |                       |                         |                   |                        |
| Projects     |                         |                       |                         |                   |                        |
| Public data  |                         |                       |                         |                   |                        |
| Private data |                         |                       |                         |                   |                        |
| Community    |                         |                       |                         |                   |                        |
| Sharing      |                         |                       |                         |                   |                        |
| Naming       |                         |                       |                         |                   |                        |
| Research     |                         |                       |                         |                   |                        |
| Terms of use |                         |                       |                         |                   |                        |

**Data sharing**

*Please tell us about your **data***

**Q5** Please select if you have ever tracked, collected, or otherwise been in possession of your own data about:

Genes and/or other genetic data

Vital Signs

Stress Levels

Mood

Physical Activity

Weight/BMI

Diet

Medication

Sleep Patterns

Smoking Patterns

Alcohol Consumption

Environmental Exposure

Meditation

Personal Genetic Test

Menstrual Cycles

Microbiome

Geolocation

Infectious Disease(s) Contracted

Blood Count

Cholesterol Levels

Diabetes

Other Blood Test Results not listed here (please specify below)

Other Chronic Condition or Disease not listed here (please specify below)

Other (please specify)

|  |
|--|
|  |
|--|

**Data sharing**

Please tell us about your *past practices*

**Q6** Please select if you have ever shared on Open Humans your data about:

Genes and/or other genetic data

Vital Signs

Stress Levels

Mood

Physical Activity

Weight/BMI

Diet

Medication

Sleep Patterns

Smoking Patterns

Alcohol Consumption

Environmental Exposure

Meditation

Personal Genetic Test

Menstrual Cycles

Microbiome

Geolocation

Infectious Disease(s) Contracted

Blood Count

Cholesterol Levels

Diabetes

Other Blood Test Results not listed here (please specify below)

Other Chronic Condition or Disease not listed here (please specify below)

Other (please specify)

**Data sharing**

Please tell us about your *past practices*

**Q7** Please select if you have ever shared on any online platforms other than Open Humans your data about:

Genes and/or other genetic data

Vital Signs

Stress Levels

Mood

Physical Activity

Weight/BMI

Diet

Medication

Sleep Patterns

Smoking Patterns

Alcohol Consumption

Environmental Exposure

Meditation

Personal Genetic Test

Menstrual Cycles

Microbiome

Geolocation

Infectious Disease(s) Contracted

Blood Count

Cholesterol Levels

Diabetes

Other Blood Test Results not listed here (please specify below)

Other Chronic Condition or Disease not listed here (please specify below)

Other (please specify)

**Data sharing**

Please tell us about your *past practices*

**Q8** Please select if you have ever shared your genetic data on any of the following platforms:

OpenSNP

SNPedia

DNALand

23andMe

AncestryDNA

Heterogeneous

GedMatch

Harvard Personal Genome Project

UK Personal Genome Project

Other (please specify)

## Data sharing

Please tell us about a *hypothetical decision*

**Q9** If you were in possession of these kinds of data, which ones would you agree to share for research purposes in the future?

|                                          | Strongly disagree<br>(I would never share this data) | Somewhat disagree<br>(I would rather not share this data) | Neither agree nor disagree<br>(It depends, I don't know if I would share this data) | Somewhat agree<br>(I would probably share this data) | Strongly agree<br>(I would absolutely share this data) |
|------------------------------------------|------------------------------------------------------|-----------------------------------------------------------|-------------------------------------------------------------------------------------|------------------------------------------------------|--------------------------------------------------------|
| Genes and/or other genetic data          |                                                      |                                                           |                                                                                     |                                                      |                                                        |
| Vital Signs                              |                                                      |                                                           |                                                                                     |                                                      |                                                        |
| Stress Levels                            |                                                      |                                                           |                                                                                     |                                                      |                                                        |
| Mood                                     |                                                      |                                                           |                                                                                     |                                                      |                                                        |
| Physical Activity                        |                                                      |                                                           |                                                                                     |                                                      |                                                        |
| Weight/BMI                               |                                                      |                                                           |                                                                                     |                                                      |                                                        |
| Diet                                     |                                                      |                                                           |                                                                                     |                                                      |                                                        |
| Medication                               |                                                      |                                                           |                                                                                     |                                                      |                                                        |
| Sleep Patterns                           |                                                      |                                                           |                                                                                     |                                                      |                                                        |
| Smoking Patterns                         |                                                      |                                                           |                                                                                     |                                                      |                                                        |
| Alcohol Consumption                      |                                                      |                                                           |                                                                                     |                                                      |                                                        |
| Environmental Exposure                   |                                                      |                                                           |                                                                                     |                                                      |                                                        |
| Meditation                               |                                                      |                                                           |                                                                                     |                                                      |                                                        |
| Personal Genetic Test                    |                                                      |                                                           |                                                                                     |                                                      |                                                        |
| Menstrual Cycles                         |                                                      |                                                           |                                                                                     |                                                      |                                                        |
| Microbiome                               |                                                      |                                                           |                                                                                     |                                                      |                                                        |
| Geolocation                              |                                                      |                                                           |                                                                                     |                                                      |                                                        |
| Infectious Disease(s) Contracted         |                                                      |                                                           |                                                                                     |                                                      |                                                        |
| Blood Count                              |                                                      |                                                           |                                                                                     |                                                      |                                                        |
| Cholesterol Levels                       |                                                      |                                                           |                                                                                     |                                                      |                                                        |
| Diabetes                                 |                                                      |                                                           |                                                                                     |                                                      |                                                        |
| Other Blood Test Results not listed here |                                                      |                                                           |                                                                                     |                                                      |                                                        |



---

Other Chronic  
Condition or  
Disease not  
listed here

Comments:

|  |
|--|
|  |
|--|

**Governance of ethical requirements**

Please tell us your *opinion*

For research projects on online data sharing platforms:

**Q10** Who should ensure that the research is conducted in a *methodologically rigorous* manner?

*Multiple answers are possible*

- No one in particular, because it does not apply
- No one in particular, for another reason (please specify below)
- The users participating in the project
- Any registered users of the platform
- The creators/directors of the project
- The creators/owners/directors of the platform
- An independent non-specialized committee (e.g. a group of voluntary citizens)
- An independent ethics committee (e.g. a University Institutional Review Board)
- Others (please specify below)

Comments:

For research projects on online data sharing platforms:

**Q11** Who should ensure that *recruitment is fair and balanced* (and not restricted to certain populations on the basis of convenience, efficiency, or by exploiting vulnerable individuals or communities)?

*Multiple answers are possible*

- No one in particular, because it does not apply
- No one in particular, for another reason (please specify below)
- The users participating in the project
- Any registered users of the platform
- The creators/directors of the project
- The creators/owners/directors of the platform
- An independent non-specialized committee (e.g. a group of voluntary citizens)
- An independent ethics committee (e.g. a University Institutional Review Board)
- Others (please specify below)

Comments:

For research projects on online data sharing platforms:

**Q12** Who should ensure that *potential risks* for individual subjects are *minimized*?

*Multiple answers are possible*

- No one in particular, because it does not apply
- No one in particular, for another reason (please specify below)
- The users participating in the project
- Any registered users of the platform
- The creators/directors of the project
- The creators/owners/directors of the platform
- An independent non-specialized committee (e.g. a group of voluntary citizens)
- An independent ethics committee (e.g. a University Institutional Review Board)
- Others (please specify below)

Comments:

For research projects on online data sharing platforms:

**Q13** Who should ensure that the *potential benefits* for individual subjects are *enhanced*?

*Multiple answers are possible*

- No one in particular, because it does not apply
- No one in particular, for another reason (please specify below)
- The users participating in the project
- Any registered users of the platform
- The creators/directors of the project
- The creators/owners/directors of the platform
- An independent non-specialized committee (e.g. a group of voluntary citizens)
- An independent ethics committee (e.g. a University Institutional Review Board)
- Others (please specify below)

Comments:

For research projects on online data sharing platforms:

**Q14** Who should ensure that the potential benefits for individual subjects or for society are *proportionate* to the risks (or outweigh them)?

*Multiple answers are possible*

- No one in particular, because it does not apply
- No one in particular, for another reason (please specify below)
- The users participating in the project
- Any registered users of the platform
- The creators/directors of the project
- The creators/owners/directors of the platform
- An independent non-specialized committee (e.g. a group of voluntary citizens)
- An independent ethics committee (e.g. a University Institutional Review Board)
- Others (please specify below)

Comments:

For research projects on online data sharing platforms:

**Q15** Who should ensure a research project's *compliance with ethical requirements*?

*Multiple answers are possible*

- No one in particular, because it does not apply
- No one in particular, for another reason (please specify below)
- The users participating in the project
- Any registered users of the platform
- The creators/directors of the project
- The creators/owners/directors of the platform
- An independent non-specialized committee (e.g. a group of voluntary citizens)
- An independent ethics committee (e.g. a University Institutional Review Board)
- Others (please specify below)

Comments:

For research projects on online data sharing platforms:

**Q16** Who should ensure that the *impact of potential conflicts of interest is minimized*?

*Multiple answers are possible*

- No one in particular, because it does not apply
- No one in particular, for another reason (please specify below)
- The users participating in the project
- Any registered users of the platform
- The creators/directors of the project
- The creators/owners/directors of the platform
- An independent non-specialized committee (e.g. a group of voluntary citizens)
- An independent ethics committee (e.g. a University Institutional Review Board)
- Others (please specify below)

Comments:

For research projects on online data sharing platforms:

**Q17** Who should ensure that *individuals are accurately informed* of the purpose, methods risks, benefits, and alternatives to the research?

*Multiple answers are possible*

- No one in particular, because it does not apply
- No one in particular, for another reason (please specify below)
- The users participating in the project
- Any registered users of the platform
- The creators/directors of the project
- The creators/owners/directors of the platform
- An independent non-specialized committee (e.g. a group of voluntary citizens)
- An independent ethics committee (e.g. a University Institutional Review Board)
- Others (please specify below)

Comments:

For research projects on online data sharing platforms:

**Q18** Who should ensure that individuals *understand* this information and its bearing on their own situation?

*Multiple answers are possible*

- No one in particular, because it does not apply
- No one in particular, for another reason (please specify below)
- The users participating in the project
- Any registered users of the platform
- The creators/directors of the project
- The creators/owners/directors of the platform
- An independent non-specialized committee (e.g. a group of voluntary citizens)
- An independent ethics committee (e.g. a University Institutional Review Board)
- Others (please specify below)

Comments:

For research projects on online data sharing platforms:

**Q19** Who should ensure that individuals make a *voluntary and uncoerced decision* whether to participate?

*Multiple answers are possible*

- No one in particular, because it does not apply
- No one in particular, for another reason (please specify below)
- The users participating in the project
- Any registered users of the platform
- The creators/directors of the project
- The creators/owners/directors of the platform
- An independent non-specialized committee (e.g. a group of voluntary citizens)
- An independent ethics committee (e.g. a University Institutional Review Board)
- Others (please specify below)

Comments:

For research projects on online data sharing platforms:

**Q20** Who should ensure that individuals' *privacy is respected* by managing the information in accordance with confidentiality rules?

*Multiple answers are possible*

- No one in particular, because it does not apply
- No one in particular, for another reason (please specify below)
- The users participating in the project
- Any registered users of the platform
- The creators/directors of the project
- The creators/owners/directors of the platform
- An independent non-specialized committee (e.g. a group of voluntary citizens)
- An independent ethics committee (e.g. a University Institutional Review Board)
- Others (please specify below)

Comments:

## **Self-experimentation**

Below, we present three different cases of self-experimentation

*Please tell us your **opinion***

### *Scenario 1*

A person wants to be more productive in the workplace and, for this purpose, downloads a mobile app to keep track of activities during the workday: time spent on certain tasks, meals and drinks, and interaction with other people. Then the person compares the data across time to understand what affects performance at work.

**Q21** How much do you approve or disapprove of the self-experimentation in this example?

Strongly approve

Approve

Neither approve nor disapprove

Disapprove

Strongly disapprove

### *Scenario 2*

A person has a condition that is not properly responding to the treatment prescribed by the clinician. This person begins self-medicating with drugs synthesized at home.

**Q22** How much do you approve or disapprove of the self-experimentation in this example?

Strongly approve

Approve

Neither approve nor disapprove

Disapprove

Strongly disapprove

### *Scenario 3*

A person has been overweight for many years despite trying different diets recommended by the clinician. The person decides to change the daily diet and switch from omnivore to vegetarian.

**Q23** How much do you approve or disapprove of the self-experimentation in this example?

Strongly approve

Approve

Neither approve nor disapprove

Disapprove

Strongly disapprove



## **Governance of Open Humans**

Please tell us your *opinion and motivation*

**Q24** Who do you think should be able to participate in decisions about the Open Humans platform?

The users participating in research projects

Any registered users of the platform

An independent non-specialized committee (e.g. a group of voluntary citizens)

An independent qualified ethics committee (e.g. a University Institutional Review Board)

The creators/owners/directors of the platform

Others (please specify)

**Q25** How important has the non-profit status of Open Humans been on your decision to sign up/navigate the platform?

Not important at all

Not so important

Somewhat important

Very important

Extremely important

**Q26** If it were possible, would you personally like to be involved in decisions about the governance of the Open Humans platform?

No, not at all

No, probably not

Maybe, I don't know

Yes, probably

Yes, absolutely

**Q27** How much time are you willing to put into governing the Open Humans platform?

No time at all

Only little time occasionally

A few hours monthly

A few hours weekly

As much time as it takes

**Q28** Do you have any comments about the governance of Open Humans? Any questions? Any suggestions? Any complaints?

Please tell us about **yourself**

**Q29** To what extent do you agree with the following statements?

|                                                                                                                                                                                                                                                                                  | Strongly disagree | Somewhat disagree | Neither agree nor disagree | Somewhat agree | Strongly agree |
|----------------------------------------------------------------------------------------------------------------------------------------------------------------------------------------------------------------------------------------------------------------------------------|-------------------|-------------------|----------------------------|----------------|----------------|
| Sharing my data makes me feel part of scientific research<br>I use Open Humans because I want to learn more about myself<br>It is fun to explore health data<br>I want to contribute to the advancement of medical research<br>I want to compare my data to that of other people |                   |                   |                            |                |                |

**Q30** Have you ever participated in one of the following types of research project?

|                                                                                                                                                                  | No, never | Yes, in the past week | Yes, in the past month | Yes, in the past six months | Yes, in the past year | Yes, more than one year ago |
|------------------------------------------------------------------------------------------------------------------------------------------------------------------|-----------|-----------------------|------------------------|-----------------------------|-----------------------|-----------------------------|
| Clinical trial<br>Non-clinical trial<br>Survey/questionnaire (the current survey notwithstanding)<br>Qualitative study (e.g.: interview or focus group)<br>Other |           |                       |                        |                             |                       |                             |

Comments:

**Q31** What portion of your medical costs does your health insurance cover?

It covers **all** of my medical costs

It covers **most** of my medical costs

It covers **some** of my medical costs, enough for me not to worry

It covers **some** of my medical costs, but significantly less than needed

It covers **almost none** of my medical costs

I have health insurance but **don't know** how much of my medical costs are covered

I do not have health insurance

Other (please specify)

**Q32** Do you have life insurance?

Yes

No

I don't know

I prefer not to answer

**Q33** How would you rate the quality of your health?

Poor

Fair

Good

Very good

Excellent

I prefer not to answer

**Q34** Do you have any work or study experience in the health field?

Yes

No

Comments:

**Q35** Which statement best describes your current employment status?

- Working (paid employee)
- Working (self-employed)
- Not working (temporary layoff from a job)
- Not working (retired)
- Not working (disabled)
- I prefer not to answer
- Other (please specify)

**Q36** What is the highest level of school you have completed or the highest degree you have received?

- Less than high school degree
- High school graduate (high school diploma or equivalent including GED)
- Some college but no degree
- Associate degree in college (2-year)
- Bachelor's degree in college (4-year)
- Master's degree
- Doctoral degree
- Professional degree (JD, MD)
- I prefer not to answer
- Other (please specify)

**Q37** Do you suffer from any chronic conditions (e.g.: asthma, diabetes, multiple sclerosis)?

- Yes
- No
- I don't know
- I prefer not to answer

Comments:

**Q38** Do any of your family members suffer from any chronic conditions (e.g.: asthma, diabetes, multiple sclerosis)?

Yes

No

I don't know

I prefer not to answer

Comments:

**Q39** What is your gender?

Male

Female

Non-binary

Other (please specify)

**Q40** What is your age?

- 18-24
- 25-34
- 35-44
- 45-54
- 55-64
- 65+

**Q41** How many children do you have?

- I don't have children
- 1
- 2
- 3 or more

**Q42** What is your marital status?

- Married
- Widowed
- Divorced
- Separated
- Single
- In a relationship
- Other

**Q43** In which country do you live?

▼ Afghanistan ... Zimbabwe

**Q44** If applicable, please select one or more ethnic groups that you consider yourself to be:

- White
- Black or African American
- Hispanic or Latinx
- American Indian or Alaska Native
- Asian
- Native Hawaiian or Pacific Islander
- I prefer not to answer
- Other (please specify)





That's it, you're done. Thank you very much for your participation.

Would you like to receive your own answers to this survey and/or other participants' answers as an aggregate?

(If you select "yes" the data will be available in your Open Human account once the study is over. Don't forget to click "DONE".)

Yes, please send me both

Yes, please send me my own answers only

Yes, please send me other participants' answers (aggregate)

No, thanks
